# Supplementary material for: Prediction of glycaemic control in young children and adolescents with type 1 diabetes mellitus using mixed-effects logistic regression modelling
Source: PLoS One. 2017 Aug 2;12(8):e0182181. doi: 10.1371/journal.pone.0182181 (PMC5540397; doi:10.1371/journal.pone.0182181)
Supplement: S1 Table — (CSV) [file pone.0182181.s001.csv]

Subject identifier	Disease duration (years)	Gender	Age (years)	Age of disease onset (years)	Fractional disease duration	Height (cm)	Weight (kg)	BMI (kg/m2)	HbA1c (%)	Insulin dose per injection (U)	Daily insulin dose (U)	Visit to diabetes educator (0 = no 1 = yes)	Visit to dietitian (0 = no 1 = yes)	Visit to psycologist (0 = no 1 = yes)	Satisfactory glyaemic control (0 < 9% 1 > 9%)
1	7.57	Female	11.47	3.9	0.66	142.3	38.95	19.24	9	13	26	0	0	1	0
2	7.01	Male	17.61	10.6	0.398	182.6	75	22.49	9.7	62	124	0	1	0	0
3	10.05	Male	10.85	0.8	0.926	136.8	31.9	17.05	8.9	17	34	0	0	1	1
4	4.64	Female	14.44	9.8	0.321	165	62.4	22.92	11.3	41	82	0	1	1	0
5	11.06	Female	17.56	6.5	0.63	172.7	72.5	24.31	9.1	22.5	90	1	0	1	0
6	12.09	Female	18.49	6.4	0.654	166.9	87.4	31.38	9.3	21	84	1	1	0	0
7	9.83	Male	18.43	8.6	0.533	183.2	70.75	21.08	8.2	17.5	70	0	0	0	1
8	9.3	Male	14.6	5.3	0.637	148	41.45	18.92	9.7	30	60	0	0	1	0
9	7.54	Female	11.54	4	0.653	143.1	37.8	18.46	9.7	8	8	0	0	0	0
10	8.51	Male	12.91	4.4	0.659	161.4	41.6	15.97	8.8	12.5	50	0	0	0	1
11	8.48	Male	18.98	10.5	0.447	177.4	82	26.06	8.4	22.5	90	0	1	1	1
12	5.74	Female	14.24	8.5	0.403	157	67	27.18	11.4	43	86	1	0	0	0
13	5.24	Male	14.24	9	0.368	168	71	25.16	7.3	38	76	0	1	0	1
14	6.41	Male	11.91	5.5	0.538	156.6	60.5	24.67	7.9	25.5	51	1	0	1	1
15	6.28	Female	15.08	8.8	0.416	170.9	63.5	21.74	11.8	25.5	102	1	1	1	0
16	6.3	Male	12.7	6.4	0.496	161.4	59.2	22.73	9.3	33	66	1	0	1	0
17	8.16	Female	16.36	8.2	0.499	167.7	65.2	23.18	8	23.5	94	0	1	1	1
18	14.24	Male	19.84	5.6	0.718	174	70.7	23.4	8.5	23	92	1	0	0	1
19	16.24	Male	17.54	1.3	0.926	167.2	61.8	22.11	10.2	19.25	77	0	1	0	0
20	5.12	Male	17.82	12.7	0.287	185.3	93	27.09	9.2	68.5	137	1	0	0	0
23	0.88	Male	5.38	4.5	0.164	117.9	21.8	15.68	6.1	5	10	1	0	0	1
24	0.14	Male	12.84	12.7	0.011	152.6	42.25	18.14	7.4	25	50	0	0	0	1
25	0.37	Male	6.27	5.9	0.059	120.5	27.65	19.04	7.5	4.75	9.5	0	1	1	1
26	4.4	Female	17	12.6	0.259	172.1	56.2	18.97	11.5	11.5	46	1	0	1	0
27	2.85	Female	16.85	14	0.169	162	52.9	20.16	7.2	9	36	1	0	0	1
29	0.08	Female	15.28	15.2	0.005	166.8	62.3	22.39	10.1	21.5	86	1	0	1	0
30	4.78	Male	16.38	11.6	0.292	169.8	64.1	22.23	12.2	35	70	1	0	1	0
31	0.25	Female	14.85	14.6	0.017	157.7	59.7	24.01	5.7	24	48	1	1	1	1
32	3.47	Female	15.47	12	0.224	166.2	98.5	35.66	12.7	48	96	1	0	0	0
33	10.81	Female	17.01	6.2	0.636	163.9	65.15	24.25	10	22.5	45	1	0	0	0
34	0.24	Male	15.04	14.8	0.016	173.1	70.6	23.56	5.9	16.5	33	0	0	0	1
35	0.25	Female	12.75	12.5	0.02	165.4	65.9	24.09	7	14	56	0	0	1	1
36	6.41	Male	19.81	13.4	0.324	192.6	67.65	18.24	8.5	18.5	74	1	0	0	1
37	12.72	Male	16.12	3.4	0.789	183.6	70.7	20.97	9.3	46	92	0	0	0	0
38	1.18	Female	13.98	12.8	0.084	152	64.4	27.87	9.6	21.5	43	0	1	0	0
39	1.83	Male	14.13	12.3	0.13	181.4	86.1	26.17	9	30.5	122	1	0	0	0
40	12.96	Male	15.76	2.8	0.822	164.3	55.7	20.63	7.9	25.5	51	1	0	0	1
41	11.07	Male	17.67	6.6	0.626	175.5	61.6	20	6.9	32.5	65	1	0	0	1
43	1.06	Female	12.46	11.4	0.085	145.6	43	20.28	7.9	13	26	1	0	0	1
44	4.14	Male	15.04	10.9	0.275	175.1	61.25	19.98	9.1	38	76	1	0	0	0
45	11.31	Female	18.31	7	0.618	161.1	65.2	25.12	8.3	12	48	1	0	0	1
46	0.13	Male	12.23	12.1	0.011	163.4	53.1	19.89	9.2	29	48	0	0	0	0
47	0.58	Male	11.98	11.4	0.048	150.1	39.55	17.55	9.4	10.5	21	1	0	1	0
48	0.33	Male	16.23	15.9	0.02	170.6	56.95	19.57	7.1	8	32	0	1	0	1
49	4.24	Male	14.34	10.1	0.296	170.4	56.95	19.61	9.1	14	56	1	1	0	0
50	6.21	Male	16.21	10	0.383	168.3	41.3	14.58	14	26	78	1	0	0	0
51	11.06	Female	16.86	5.8	0.656	167.3	61.6	22.01	7	10.5	42	1	0	0	1
52	8.38	Female	13.98	5.6	0.599	159.7	64.05	25.11	14	30	60	1	0	0	0
53	2.4	Male	15.3	12.9	0.157	169.5	58.4	20.33	8.8	12	48	0	1	0	1
54	0.12	Female	10.62	10.5	0.011	139.6	44.65	22.91	9.3	28	56	1	0	0	0
55	9.6	Female	14.1	4.5	0.681	152.9	40.6	17.37	9	28.5	57	1	0	0	0
56	8.22	Female	16.22	8	0.507	159.4	65	25.58	8.9	12.75	51	1	1	1	1
57	8.89	Male	12.59	3.7	0.706	151.7	49.35	21.44	11.1	25	50	1	1	1	0
58	12.94	Female	15.34	2.4	0.844	154.7	53.4	22.31	11.5	34	68	0	0	1	0
59	2.66	Male	10.16	7.5	0.262	146.5	34.4	16.03	9	8.75	35	1	0	0	0
60	8.55	Female	16.85	8.3	0.507	164.5	56.7	20.95	8	24.5	49	1	0	0	1
61	4.8	Male	13.5	8.7	0.356	157.2	48.55	19.65	11.8	44	88	1	0	0	0
62	0.8	Male	10	9.2	0.08	161.2	62.3	23.97	9	11.5	23	1	0	0	0
63	1.64	Female	13.44	11.8	0.122	140.8	43.5	21.94	7.4	16	32	1	0	1	1
64	6.96	Male	17.76	10.8	0.392	168	70.1	24.84	9.2	34.5	69	0	0	0	0
65	6.62	Male	18.52	11.9	0.357	178.2	68	21.41	8	28	112	1	1	0	1
66	7.2	Female	15.8	8.6	0.456	164	63.35	23.55	9.4	19.5	78	0	1	0	0
67	5.93	Male	14.33	8.4	0.414	167.9	62.8	22.28	7.6	20	60	1	0	1	1
68	5.7	Male	15.9	10.2	0.358	179.6	71.55	22.18	10.3	43	86	1	1	0	0
70	6.89	Female	19.39	12.5	0.355	168.8	64.5	22.64	8.4	34	68	1	1	0	1
71	0.25	Male	9.15	8.9	0.027	120.9	25.65	17.55	7	2	2	1	0	0	1
72	5.06	Male	14.96	9.9	0.338	162	63.2	24.08	10.2	23	69	1	0	0	0
73	3.12	Female	15.42	12.3	0.202	161.3	62.6	24.06	8.5	14.75	59	0	0	1	1
74	5.71	Female	16.91	11.2	0.338	162.2	86.55	32.9	12.3	21	84	1	1	0	0
75	4.7	Female	14.7	10	0.32	166.3	73.2	26.47	7.4	51	102	1	0	0	1
76	4.5	Male	8.9	4.4	0.506	138	41.35	21.71	8.2	20.5	41	0	0	1	1
77	5.32	Male	18.32	13	0.29	175.4	73	23.7	9.7	45	90	1	0	0	0
78	3.97	Female	12.67	8.7	0.313	161.6	54.95	21.04	10.5	43.5	87	1	0	0	0
80	3.87	Male	12.97	9.1	0.298	156.7	58	23.62	7.8	30	60	0	0	1	1
81	3.7	Female	14.9	11.2	0.248	166.7	68.3	24.58	11.2	54	108	0	1	0	0
82	2.78	Female	14.58	11.8	0.191	168.7	63.7	22.38	8.6	37	74	0	1	0	1
83	1.64	Female	15.44	13.8	0.106	167.2	52.2	18.67	11.7	11.25	45	0	1	1	0
84	0.26	Male	12.56	12.3	0.021	156.1	44.1	18.1	7.2	9	18	1	0	1	1
85	3.75	Female	18.05	14.3	0.208	169.6	79.9	27.8	6.2	42	84	0	0	1	1
87	2.35	Male	18.55	16.2	0.127	170.9	63.65	21.79	8.3	16.5	66	0	0	0	1
88	0.59	Female	17.09	16.5	0.035	168.3	59.25	20.92	5.4	12	24	1	1	1	1
89	0.85	Male	14.75	13.9	0.058	172.8	67.9	22.74	10.4	11.75	47	1	1	1	0
90	6.3	Female	15.1	8.8	0.417	158.1	47.15	18.86	8.5	25.33	76	1	1	1	1
91	13.42	Female	16.42	3	0.817	171.6	67.7	22.99	13.5	21	84	0	0	0	0
92	1.72	Male	17.72	16	0.097	177.6	72.6	23.02	6.8	14.5	58	1	0	0	1
93	10.47	Female	18.87	8.4	0.555	177.5	70.55	22.39	7.9	16	48	1	1	0	1
95	1.7	Female	16.7	15	0.102	176.2	59.85	19.28	12.9	14	56	0	0	1	0
96	1.06	Male	14.46	13.4	0.073	168.8	61.4	21.55	8.4	9.5	38	1	0	0	1
98	3.28	Female	8.08	4.8	0.406	133	29.3	16.56	9.6	12	24	1	1	1	0
99	0.46	Male	13.46	13	0.034	185.8	86.85	25.16	6.5	18	36	0	0	1	1
100	2.45	Male	13.15	10.7	0.186	161.4	45.1	17.31	8.7	19	38	1	1	0	1
101	8.02	Female	8.82	0.8	0.909	135.2	34.8	19.04	8	16	32	0	1	0	1
102	0.24	Female	13.24	13	0.018	155.5	47	19.44	10.9	11	44	1	1	1	0
103	0.26	Female	9.26	9	0.028	138.7	34.75	18.06	6.4	21.5	43	1	0	1	1
104	0.84	Female	9.64	8.8	0.087	141.6	31.5	15.71	7.4	7.5	15	1	1	1	1
105	0.39	Female	8.69	8.3	0.045	139	34.15	17.68	7.8	7	14	1	0	0	1
106	1.65	Male	13.75	12.1	0.12	158.1	61.4	24.56	8.7	33	66	1	0	1	1
108	0.1	Female	2.7	2.6	0.037	91.9	12.69	15.03	8.9	6	12	1	1	1	1
109	0.39	Male	11.99	11.6	0.033	149.9	42.25	18.8	8.5	20	40	1	1	1	1
110	0.13	Female	13.23	13.1	0.01	153.1	63.65	27.15	9.3	24.5	49	0	0	0	0
111	0.33	Female	14.73	14.4	0.022	157.9	56.6	22.7	5.8	28.5	57	1	0	1	1
112	0.17	Female	11.57	11.4	0.015	153.3	35.4	15.06	8.7	19.5	29	1	0	1	1
113	0.16	Male	7.66	7.5	0.021	138.2	36.1	18.9	9.5	8.5	17	1	1	1	0
114	0.25	Male	15.25	15	0.016	179.2	65.4	20.37	9.8	23	46	0	1	0	0
115	0.11	Male	4.41	4.3	0.025	108.1	18.55	15.87	9.9	12.5	25	1	0	0	0
116	0.13	Male	10.73	10.6	0.012	152.4	50.3	21.66	11	22	44	1	0	1	0
117	0.63	Male	6.13	5.5	0.103	116.3	20.9	15.45	8.4	2.5	5	1	0	0	1
118	0.28	Female	7.48	7.2	0.037	129	29.35	17.64	11.1	2	4	1	0	0	0
119	0.32	Female	15.12	14.8	0.021	162.7	56	21.15	7.1	14.5	29	0	0	0	1
120	0.55	Female	13.75	13.2	0.04	162.3	47.9	18.18	8.2	22.5	45	1	0	0	1
121	0.32	Male	7.62	7.3	0.042	125.8	25.2	15.92	7.1	3	3	1	0	0	1
122	3.78	Male	15.78	12	0.24	167.8	76.4	27.13	8.2	51	102	0	0	0	1
123	4.47	Female	12.97	8.5	0.345	149.2	43.85	19.7	8.7	22	44	1	0	0	1
124	12.41	Male	13.71	1.3	0.905	149.7	51.2	22.85	8.9	18.67	56	1	0	0	1
126	3.51	Female	12.71	9.2	0.276	142.6	39.1	19.23	11.2	26	32	1	0	0	0
127	1.39	Male	11.99	10.6	0.116	165	75	27.55	9.3	28.5	57	0	0	0	0
128	10.78	Female	13.48	2.7	0.8	157.7	61	24.53	9.4	40	80	0	0	0	0
130	1.41	Female	13.21	11.8	0.107	164.5	77.9	28.79	11.6	23.25	93	0	0	0	0
131	5.82	Male	10.62	4.8	0.548	145.6	34.8	16.42	10	26.5	33	0	0	0	0
132	7.78	Female	12.28	4.5	0.634	158.2	55.25	22.08	9.1	25.5	51	0	0	0	0
133	0.18	Female	11.18	11	0.016	141.8	33.85	16.83	7.1	18.5	39	1	1	1	1
135	2.15	Female	10.35	8.2	0.208	142.7	42.3	20.77	8.4	16.5	33	0	0	0	1
136	1.81	Female	10.91	9.1	0.166	139.3	35.4	18.24	11.3	23.5	47	0	0	1	0
137	11.89	Female	18.89	7	0.629	162.5	60.9	23.06	12.6	10.25	41	1	0	0	0
138	9.35	Male	15.35	6	0.609	170.1	55.1	19.04	8.1	15.5	62	1	0	0	1
140	6.92	Male	12.82	5.9	0.54	152.3	44.45	19.16	12.5	19.5	39	0	1	0	0
142	6.08	Female	12.38	6.3	0.491	153.57	43.5	18.4	8.1	30	60	1	1	0	1
144	8.47	Female	10.57	2.1	0.801	146.4	41.65	19.43	5.9	16.5	33	0	0	0	1
145	3.53	Male	14.53	11	0.243	177.6	60.7	19.24	7.9	40	80	1	1	0	1
146	4.78	Male	8.48	3.7	0.564	132.6	36.35	20.67	9.4	13.5	27	1	0	0	0
147	0.43	Female	10.33	9.9	0.042	149.4	40.4	18.1	9.8	15.5	31	0	0	1	0
148	1.27	Female	15.17	13.9	0.084	160.8	54.55	21.1	11.5	25	50	1	0	0	0
149	3.96	Male	15.26	11.3	0.26	161	48.6	18.75	9.5	38	76	1	0	1	0
150	4.54	Female	12.44	7.9	0.365	153.1	47.55	20.29	8.8	37.5	75	0	0	0	1
151	4.26	Male	7.56	3.3	0.563	130.3	26.2	15.43	9.2	12.5	25	0	0	0	0
152	7.18	Male	8.88	1.7	0.809	134.4	31.5	17.44	9	14	28	0	0	0	0
153	1.48	Male	10.98	9.5	0.135	152.5	47.25	20.32	7.1	15.5	31	0	0	0	1
154	0.26	Female	7.66	7.4	0.034	132.7	34.15	19.39	8.1	8.5	17	1	1	1	1
155	5.09	Female	12.39	7.3	0.411	163.4	73.15	27.4	6.8	55	110	0	1	0	1
156	0.42	Male	6.62	6.2	0.063	118.9	22.87	16.18	8.7	3	6	0	1	1	1
157	4.18	Male	9.08	4.9	0.46	135.6	28.55	15.53	7.4	13.5	27	0	0	0	1
158	3.63	Male	12.73	9.1	0.285	152.2	43.35	18.71	11.8	19.5	39	0	0	0	0
159	4.91	Female	7.11	2.2	0.691	116	21.9	16.28	8.2	7.5	15	0	0	0	1
160	1.77	Female	5.97	4.2	0.296	114.5	21.1	16.09	9.3	9	18	0	0	1	0
161	6.23	Male	11.93	5.7	0.522	151.1	55.15	24.16	12.2	32.5	65	0	0	0	0
162	5.23	Female	6.73	1.5	0.777	124.4	26.6	17.19	11.5	8	16	1	0	0	0
163	6.14	Male	14.94	8.8	0.411	175.8	59	19.09	6.6	35.5	71	0	0	0	1
164	4.18	Male	5.68	1.5	0.736	112.8	21.25	16.7	8.5	8.5	17	1	0	0	1
165	6.2	Female	7.8	1.6	0.795	118.6	21.8	15.5	9.2	7	14	0	1	0	0
166	4.35	Female	11.95	7.6	0.364	161.8	57.65	22.02	9.8	36	72	1	1	0	0
167	0.37	Female	11.77	11.4	0.031	156.9	61.4	24.94	7.6	17.5	35	0	0	1	1
168	0.99	Female	5.29	4.3	0.187	109.3	20.1	16.83	9.2	6.5	13	0	1	0	0
169	4.95	Female	6.45	1.5	0.767	110.8	18.3	14.91	9.2	7	14	0	0	1	0
170	5.62	Female	10.52	4.9	0.534	142.4	38.85	19.16	9	22	44	0	1	0	0
172	3.72	Male	8.62	4.9	0.432	133.5	33.7	18.91	6.9	19	38	0	0	1	1
173	4.33	Female	17.03	12.7	0.254	165.5	73.1	26.69	8.2	32	64	0	0	1	1
174	4	Male	6.9	2.9	0.58	127.8	28.45	17.42	9.6	11.5	23	0	0	0	0
175	3.8	Male	14.9	11.1	0.255	167.3	73.4	26.22	9.6	28.5	57	0	1	0	0
176	3.07	Male	6.27	3.2	0.49	119.2	26.9	18.93	9.5	7.25	14.5	1	1	1	0
177	4.18	Female	13.58	9.4	0.308	155	54.9	22.85	7.8	45	90	1	1	0	1
178	2.46	Male	8.16	5.7	0.301	128.4	29.1	17.65	8.7	14.5	29	0	0	1	1
179	1.92	Male	8.92	7	0.215	142.8	43.7	21.43	7.6	14	28	0	1	0	1
180	3.22	Female	5.52	2.3	0.583	116	22.5	16.72	9.9	8	16	1	0	0	0
181	3.17	Female	5.07	1.9	0.625	112.5	24.7	19.52	8	10	20	1	0	0	1
182	0.74	Female	3.84	3.1	0.193	103.9	24.75	22.93	8.6	6	12	0	1	0	1
183	0.33	Male	4.33	4	0.076	101.9	16.8	16.18	8.9	3	3	1	1	0	1
184	0.09	Male	7.79	7.7	0.012	120.6	28.5	19.6	8.5	6	12	1	1	1	1
187	2.97	Female	10.17	7.2	0.292	137.1	31.25	16.63	9.5	12	24	1	0	0	0
188	1.26	Male	5.16	3.9	0.244	122.9	27.9	18.47	8.1	6.5	13	0	1	0	1
189	2.69	Male	10.39	7.7	0.259	154.7	57.55	24.05	8.8	45	90	1	0	0	1
190	2.42	Female	4.02	1.6	0.602	94.8	16.3	18.14	9.3	9	18	1	0	1	0
191	2.25	Male	12.95	10.7	0.174	159.8	55.6	21.77	7	37.5	75	0	1	0	1
192	2.52	Male	5.42	2.9	0.465	109.7	19.95	16.58	8.9	8.5	17	1	0	0	1
193	2.19	Male	7.59	5.4	0.289	132	34.05	19.54	8.3	16	16	0	0	0	1
194	0.22	Female	2.32	2.1	0.095	84.2	8.3	11.71	5.5	1.5	3	0	0	0	1
195	2.19	Male	15.19	13	0.144	185.9	64.6	18.69	6.8	16.5	33	1	0	0	1
196	2.37	Male	9.17	6.8	0.258	127.3	26.4	16.29	9	9	18	0	0	0	0
197	2.13	Male	5.63	3.5	0.378	112.7	22.8	17.95	8.3	8.5	17	0	0	0	1
199	2.1	Female	3.6	1.5	0.583	103.2	16.85	15.8	8.3	6	12	1	0	1	1
200	2.21	Female	4.81	2.6	0.459	102	18.75	18.02	8.8	6.5	13	1	0	0	1
201	1.85	Male	11.75	9.9	0.157	147	41.35	19.14	9.3	14.5	29	0	0	0	0
202	1.97	Male	8.57	6.6	0.23	128.8	28.85	17.39	8.1	10.5	21	0	0	0	1
203	1.93	Male	9.23	7.3	0.209	136.5	40.95	21.98	8.8	22.5	45	0	1	0	1
204	3.76	Male	8.26	4.5	0.455	131.7	29.2	16.83	9.1	6.5	13	0	0	0	0
205	1.71	Male	13.91	12.2	0.123	159.3	52.85	20.83	14	42.5	85	1	0	0	0
206	1.85	Female	12.55	10.7	0.147	155.3	46.7	19.36	8.2	17	34	0	0	0	1
207	7.24	Female	11.34	4.1	0.638	144.9	44.4	21.15	9.3	17.67	53	1	0	0	0
208	1.74	Female	5.44	3.7	0.32	109.9	17.95	14.86	8.9	10	10	1	0	0	1
209	2.09	Female	6.79	4.7	0.308	123.4	23.7	15.56	8.7	7.5	15	0	0	0	1
210	1.98	Female	3.98	2	0.497	103.7	16.1	14.97	10.8	9	9	1	0	1	0
211	2.93	Female	12.43	9.5	0.236	157.4	47.1	19.01	10	23	46	0	0	0	0
212	1.54	Male	11.84	10.3	0.13	147.1	36.85	17.03	8.3	28.5	57	0	1	0	1
213	1.6	Male	7.6	6	0.211	129.2	32.9	19.71	8.5	13	26	0	1	1	1
214	1.56	Female	6.16	4.6	0.253	121.7	30.2	20.39	8.3	8	16	1	0	0	1
216	1.75	Female	11.35	9.6	0.154	142.3	38.4	18.96	9.8	13.5	27	0	0	1	0
218	1.41	Male	11.91	10.5	0.118	142.9	35.65	17.46	11.3	15.5	31	0	0	1	0
219	1.35	Female	5.65	4.3	0.239	117.2	22.4	16.31	7.4	7.5	15	1	0	1	1
220	1.95	Female	15.75	13.8	0.124	159.9	47.4	18.54	8.5	26	52	0	0	1	1
221	1.11	Female	12.21	11.1	0.091	152.7	44.15	18.93	8.1	19.5	39	0	0	1	1
224	1.04	Female	13.04	12	0.08	170.5	75.7	26.04	8.8	25	50	1	1	0	1
225	1.12	Female	9.82	8.7	0.114	142.2	30.2	14.94	10.7	9.5	19	0	0	1	0
226	1.06	Female	10.56	9.5	0.1	135.1	32.6	17.86	8	8	8	0	0	1	1
227	0.55	Female	11.35	10.8	0.048	162.2	44.65	16.97	5.6	4.5	9	0	1	0	1
228	1.14	Female	3.94	2.8	0.289	103.9	18.7	17.32	8.6	9.5	19	1	1	1	1
229	0.95	Female	10.95	10	0.087	152.2	39.35	16.99	8.3	14	28	0	0	0	1
230	0.16	Female	6.86	6.7	0.023	122	22.65	15.22	8.4	10	20	1	0	1	1
231	0.98	Female	8.48	7.5	0.116	134.6	37.3	20.59	8.2	12	24	0	1	0	1
232	0.93	Male	9.93	9	0.094	131.3	32.35	18.76	9.4	11	22	1	0	0	0
233	0.65	Female	10.85	10.2	0.06	142.4	37.4	18.44	9.5	14	28	0	0	1	0
234	0.98	Female	12.48	11.5	0.079	154.7	38.55	16.11	6.1	10	20	1	0	0	1
235	0.68	Female	5.38	4.7	0.126	107.5	16.8	14.54	7.6	7.5	15	0	0	1	1
237	1	Male	15.3	14.3	0.065	174.8	52.1	17.05	6.7	23.5	47	1	0	0	1
239	0.93	Female	6.33	5.4	0.147	123.7	26.65	17.42	8.1	14	28	1	1	0	1
240	0.5	Female	1.2	0.7	0.417	72.5	8.16	15.52	11	3	6	1	0	0	0
242	0.58	Male	7.88	7.3	0.074	128	29.25	17.85	7.6	4	4	0	1	1	1
243	0.5	Female	3.7	3.2	0.135	96.8	15.3	16.33	8.5	4.5	9	0	0	1	1
244	0.27	Female	9.07	8.8	0.03	142.3	52.2	25.78	7.8	10	20	1	1	0	1
245	0.34	Female	2.24	1.9	0.152	91.4	13.75	16.46	7.2	3	3	1	1	0	1
246	0.21	Female	1.41	1.2	0.149	80	11.8	18.4	7.8	2	2	1	1	1	1
247	0.26	Female	7.26	7	0.036	121.1	24.35	16.6	7.3	13.5	27	0	0	0	1
248	0.26	Female	4.56	4.3	0.057	114.2	20.6	15.8	7.9	3.5	7	1	0	0	1
249	0.18	Male	8.28	8.1	0.022	128.3	28.45	17.28	7.3	3.5	7	0	1	0	1
250	0.3	Male	11.6	11.3	0.026	137.1	47.5	25.27	5.9	15	30	1	1	0	1
251	0.15	Female	11.65	11.5	0.013	154.5	48.35	20.26	9.6	26.5	53	1	0	0	0
252	1.12	Female	4.72	3.6	0.237	105.4	19	17.1	9.1	8.25	16.5	0	0	1	0
253	1.07	Male	10.67	9.6	0.1	144.7	50.95	24.33	8.9	12.5	25	1	0	0	1
254	5.37	Male	11.27	5.9	0.476	138.5	35.05	18.27	7.7	22.5	45	1	0	1	1
255	2.34	Female	11.14	8.8	0.21	136.7	33.9	18.14	6.8	9.5	19	1	0	0	1
256	0.26	Male	3.76	3.5	0.069	109.3	20.1	16.83	6.7	9.5	19	0	1	0	1
258	0.29	Female	11.59	11.3	0.025	143.7	45.8	22.18	7.5	4.5	9	1	1	0	1
260	0.21	Male	7.51	7.3	0.028	128.7	28.4	17.15	7.1	11.5	23	0	0	1	1
261	0.45	Male	1.55	1.1	0.29	85.2	12.6	17.36	9.8	4	8	1	0	0	0
262	0.35	Male	1.75	1.4	0.2	85.5	11.85	16.21	8.5	5.5	11	1	1	0	1
263	0.15	Male	11.65	11.5	0.013	143.5	34	16.51	7.8	7	7	1	1	0	1
264	0.48	Female	14.88	14.4	0.032	174.4	98	32.22	5.7	22	44	1	1	0	1
265	0.3	Male	11.7	11.4	0.026	149.5	45.35	20.29	7.2	8.5	17	0	1	0	1
266	0.67	Female	3.07	2.4	0.218	99.3	15.8	16.02	9.1	5	10	1	0	0	0
267	10.72	Female	12.92	2.2	0.83	148.2	42.95	19.56	10.8	38.5	77	1	0	0	0
269	0.29	Male	13.89	13.6	0.021	158.9	47.5	18.81	6.9	13	26	1	0	1	1
270	0.24	Female	14.34	14.1	0.017	161.9	64.1	24.45	8.5	26.5	53	0	1	1	1
271	0.39	Male	14.09	13.7	0.028	144.1	34.45	16.59	5.5	7	14	1	0	0	1
272	0.4	Male	13.2	12.8	0.03	164.7	73.3	27.02	6	13.5	27	1	0	0	1
273	0.64	Male	8.24	7.6	0.078	137.7	42.9	22.63	8.7	10.5	21	0	0	1	1
274	0.19	Female	6.19	6	0.031	119.2	23.1	16.26	7.1	8	16	1	0	0	1
276	0.37	Male	2.17	1.8	0.171	87.9	11.95	15.47	10	5.5	11	1	1	0	0
277	0.25	Female	8.15	7.9	0.031	132.9	26.7	15.12	7.9	12.5	23	1	0	0	1
279	0.5	Female	6.3	5.8	0.079	118.2	21.7	15.53	7.3	5.5	11	1	1	0	1
280	0.12	Female	4.72	4.6	0.025	107	18	15.72	9.7	6	6	1	1	0	0
282	0.56	Female	7.46	6.9	0.075	135.1	28.25	15.48	8	8.5	17	1	0	0	1
283	0.45	Male	13.55	13.1	0.033	158.3	38.3	15.28	8.9	14	28	1	1	1	1
284	0.42	Female	7.82	7.4	0.054	127.4	26.5	16.33	7	9	9	1	1	0	1
285	0.28	Female	9.68	9.4	0.029	133.2	30.8	17.36	10.5	9	27	1	1	0	0
287	2.47	Male	5.27	2.8	0.469	110.1	20.5	16.91	8.5	12	12	0	0	0	1
288	0.6	Male	16.2	15.6	0.037	180.1	69.05	21.29	9.2	6.5	26	0	0	0	0
289	1.16	Male	5.36	4.2	0.216	119.9	24.2	16.83	8.3	8.5	17	0	0	1	1
290	0.91	Male	15.91	15	0.057	170.5	57.7	19.85	8.7	34.5	69	1	0	0	1
292	4.03	Male	5.53	1.5	0.729	105.8	18.7	16.71	8.4	9.5	19	1	0	0	1
294	0.39	Female	2.59	2.2	0.151	91.2	15.1	18.15	8.4	3	6	1	0	0	1
296	0.29	Female	11.49	11.2	0.025	146.6	42.2	19.64	6.9	8	16	0	1	0	1
298	0.1	Female	3.3	3.2	0.03	94	15	17	9.1	6.5	13	1	0	0	0
299	0.1	Male	15.2	15.1	0.007	165.8	50.3	18.3	11.6	18	36	0	0	0	0
300	0.36	Male	8.46	8.1	0.043	135.1	31.2	17.09	8.6	7.5	15	0	0	0	1
304	1.1	Male	5.6	4.5	0.196	126.4	26.8	16.77	8.5	9	18	0	0	1	1
307	3.95	Female	13.05	9.1	0.303	148	32.8	14.97	11.2	11.25	45	1	1	0	0
308	9.79	Male	14.89	5.1	0.657	175	57.5	18.78	7.1	17	68	0	0	0	1
309	12.23	Female	14.03	1.8	0.872	148.5	48.5	21.99	12.9	11.25	45	1	1	0	0
310	3.33	Female	9.63	6.3	0.346	132	26.2	15.04	8.5	11	22	1	1	0	1
311	6.62	Male	14.02	7.4	0.472	160	50.8	19.84	11.4	34	136	1	1	0	0
313	2.91	Female	13.31	10.4	0.219	158	72.8	29.16	13.2	10	40	1	1	0	0
314	8.11	Female	15.81	7.7	0.513	166	73.2	26.56	7.5	22.5	90	1	1	0	1
316	2.04	Female	11.84	9.8	0.172	161.5	48.4	18.56	7.8	8.75	35	1	1	0	1
317	1.81	Female	8.11	6.3	0.223	121.5	26	17.61	11	8	16	1	1	0	0
318	2.09	Female	8.39	6.3	0.249	134	33.8	18.82	8.5	15	30	1	1	0	1
319	8.92	Male	10.62	1.7	0.84	148	37.7	17.21	6.5	14	28	1	1	0	1
321	1.62	Female	13.32	11.7	0.122	158	60	24.03	9.2	16.25	65	1	1	0	0
322	5.71	Male	10.61	4.9	0.538	150.5	38.2	16.87	8.3	24	48	1	1	0	1
323	3.1	Female	10	6.9	0.31	158.5	50.5	20.1	10.3	13.33	40	1	1	0	0
325	10.35	Male	13.25	2.9	0.781	171	59.2	20.25	11	17.5	70	1	1	0	0
326	9.22	Female	13.42	4.2	0.687	153	66.5	28.41	10.4	24	96	1	1	0	0
327	2.09	Male	8.19	6.1	0.255	131	28.5	16.61	7.2	10	20	1	1	0	1
329	9.11	Male	13.01	3.9	0.7	146	43	20.17	9.6	6	90	1	1	0	0
330	0.72	Female	8.32	7.6	0.087	136.5	32.7	17.55	5	6.5	13	0	0	0	1
331	14.2	Female	15.5	1.3	0.916	161.5	54.8	21.01	13.1	26.67	80	1	1	0	0
332	2.01	Female	8.51	6.5	0.236	134.5	32.7	18.08	8.2	10	20	1	1	0	1
333	2.85	Male	9.25	6.4	0.308	141	34.2	17.2	8.1	9	18	1	1	1	1
336	0.58	Female	3.38	2.8	0.172	96.8	16	17.08	9.2	6	12	1	1	0	0
337	1.62	Male	7.92	6.3	0.205	163	33	12.42	7.1	12.5	23	1	1	0	1
342	4.44	Female	9.04	4.6	0.491	127.5	25.3	15.56	8.5	7.5	15	1	1	0	1
